# Supplementary material for: Phylogenetic analyses of plastid DNA suggest a different interpretation of morphological evolution than those used as the basis for previous classifications of Dipterocarpaceae (Malvales)
Source: Oxford University Press journal article supplement (doi:10.1093/botlinnean/box044), 2017-06-19
Supplement: box044_suppl_Appendix_S1.docx [file box044_suppl_Appendix_S1.docx]

**APPENDIX**

Table S1: Specimens used in this study. The collection number, herbarium voucher, and location is given. GenBank accession numbers of species used for phylogenetic analysis is stated.

Field collectors: JH: Jacqueline Heckenhauer, KAS: Kamariah Abu Salim, R.S.: Rosabella Samuel, SD: Sutee Duangjai;

Herbarium codes: BRUN: Brunei Forestry Centre, Brunei Darussalam, Belait; K: Royal Botanical Gardens, U.K. England, Kew; KUFF: Faculty of Forestry, Kasetsart University Herbarium, Thailand, Nakhon Pathom; PDA: Royal Botanical Gardens, Sri Lanka, Peradeniya; UBDH: Universiti Brunei Darussalam Herbarium, Gadong; WU: Herbarium of Institute of Botany, University of Vienna

n.a.: not available

GB: Sequences obtained from GenBank; Location: BD: Brunei Darussalam, UBD-CTFS 25 ha plot: Kuala Belalong, Temburong, Brunei Darussalam;

**1**DNA obtained from Kew (apps.kew.org/dnabank); **2**Material obtained from MO (Missouri Botanical Garden, Saint Louis, USA); **3**Material obtained from Biological Diversity of the Guiana Shield Program, US National Herbarium, Smithsonian Institution; **#**sequences obtained from GenBank consist of *trnL-F* intergenic spacer and *trnL* intron

gs: sample used for genome size

cs: sample used for chromosom count

| **Taxon** | **Collection** | **Voucher** | **Location** | ***rbcL*** | ***matK*** | ***trnT-trnL-trnF#*** |
| --- | --- | --- | --- | --- | --- | --- |
| **Dipterocarpoideae** | | | | | | |
| *Anisoptera grossivenia* Slooten | KASag1 | BRUN: KEP 80080/  B 000 014 | Sg.Liang. Andulau Forest Reserve, Kuala Belait, BD | KY973095 | KY972898 | KY972701 |
| KASag2 | BRUN: KEP 80080/  B 000 014 | Sg.Liang. Andulau Forest Reserve, Kuala Belait, BD | KY973096 | KY972899 | KY972702 |
| *Anisoptera laevis* Ridl. | JH02-0255 | UBDH: 02-0255 | UBD-CTFS 25 ha plot | KY973097 | KY972900 | KY972703 |
| JH16-2455 | UBDH: 16-2455 | UBD-CTFS 25 ha plot | KY973098 | KY972901 | KY972704 |
| *Anisoptera marginata* Korth. | Chase, M.W. 24861 | K: n.a. | Java, Kebun Raya, Bogor, Indonesia | KY973100 | KY972903 | KY972706 |
| KASam1 | BRUN: KEP 30418 | UBD plot, Km 13 Bt.Sawat, Kuala Belait, BD | KY973099 | KY972902 | KY972705 |
| *Anisoptera oblonga* Dyer | GB |  | Frim, Kepong, Malayasia |  | AB006371 | AB006405  AB006388 |
| *Cotylelobium burckii* F.Heim | KAScb1 | BRUN: WKM 935/  B 000 033 | UBD plot, Km 13, Jln Labi, Bt.Sawat, Kuala Belait, BD | KY973108 | KY972911 | KY972713 |
| *Cotylelobium malayanum* Slooten | GB |  | Frim Arboretum, Malayasia |  | AB246414 | AB246479  AB246544 |
| *Cotylelobium scabriusculum* Brandis | GB |  | Kottawa Forest, Sri Lanka |  | AB246415 | AB246480  AB246545 |
| *Dipterocarpus alatus* Roxb. & G.Don | SDDip2014_01 | KUFF:  S.Duangjai_Dip2014_01 | n.a. | KY973111 | KY972914 | KY972716 |
| *Dipterocarpus baudii* Korth. | GB |  | Frim, Kepong, Malaysia |  | AB006376 | AB006410  AB006393 |
| *Dipterocarpus borneensis* Slooten | KASdb1 | n.a. | n.a | KY973112 | KY972915 | KY972717 |
| KASdb2 | n.a. | n.a | KY973113 | KY972916 | KY972718 |
| *Dipterocarpus caudiferus* Merr. | JH15-0406 | UBDH: 15-0406 | UBD-CTFS 25 ha plot | KY973120 | KY972923 | KY972725 |
| JH15-0427 | UBDH: 15-0427 | UBD-CTFS 25 ha plot | KY973121 | KY972924 | KY972726 |
| *Dipterocarpus confertus* Slooten | JH01-1119 | UBDH: 01-1119 | UBD-CTFS 25 ha plot | KY973116 | KY972919 | KY972721 |
| JH01-1381 | UBDH: 01-1381 | UBD-CTFS 25 ha plot | KY973117 | KY972920 | KY972722 |
| *Dipterocarpus cornutus* Dyer | GB |  | Frim Arboretum, Malayasia |  | AB246472 | AB246537  AB246602 |
| *Dipterocarpus glandulosus* Thwaites | GB |  | Kanneliya Forest Reserve, Sri Lanka |  | AB246477 | AB246542  AB246607 |
| *Dipterocarpus hispidus* Thwaites | GB |  | Wilpita Forest, Sri Lanka |  | AB246476 | AB246541  AB246606 |
| R.S. D-7ags | PDA: D-7a | Arboretum, The Royal Botanical Gardens, Peradeniya, Sri Lanka |  |  |  |
| *Dipterocarpus insignis* Thwaites | GB |  | Kanneliya Forest Reserve, Sri Lanka |  | AB246475 | AB246540  AB246605 |
| *Dipterocarpus kerrii* King | GB |  | Frim, Kepong, Malayasia |  | AB006375 | AB006409  AB006392 |
| *Dipterocarpus palembanicus* Slooten | KASdp1 | n.a. | n.a | KY973122 | KY972925 | KY972727 |
| KASdp2 | n.a. | n.a | KY973123 | KY972926 | KY972728 |
| *Dipterocarpus palembanicus* subsp. *borneensis* P.S.Ashton | JH04-3068 | UBDH: 04-3068 | UBD-CTFS 25 ha plot | KY973109 | KY972912 | KY972714 |
| JH20-2907 | UBDH: 20-2907 | UBD-CTFS 25 ha plot | KY973110 | KY972913 | KY972715 |
| JH06-1278 | UBDH: 06-1278 | UBD-CTFS 25 ha plot | KY973118 | KY972921 | KY972723 |
| JH07-1768 | UBDH: 07-1768 | UBD-CTFS 25 ha plot | KY973119 | KY972922 | KY972724 |
| *Dipterocarpus cf. verrucosus* Foxw. ex Slooten | JH05-1706 | UBDH: 05-1706 | UBD-CTFS 25 ha plot | KY973114 | KY972917 | KY972719 |
| JH05-1711 | UBDH: 05-1711 | UBD-CTFS 25 ha plot | KY973115 | KY972918 | KY972720 |
| *Dipterocarpus zeylanicus* Thwaites | R.S. D-20cs, gs | PDA: D-20 | Arboretum, The Royal Botanical Gardens, Peradeniya, Sri Lanka | KY973124 | KY972927 | KY972729 |
| R.S. C-112 | PDA: C-112 | Arboretum, The Royal Botanical Gardens, Peradeniya, Sri Lanka | KY973125 | KY972928 | KY972730 |
| *Dryobalanops aromatica* C.F.Gaertn. | KASda1 | BRUN: BRUN 17436/  B 000 325 | UBD plot, Andulau Forest Reserve,  Kuala Belait, BD | KY973126 | KY972930 | KY972732 |
| KASda2 | BRUN: BRUN 17436/  B 000 325 | UBD plot, Andulau Forest Reserve,  Kuala Belait, BD | KY973127 | KY972931 | KY972733 |
| *Dryobalanops beccarii* Dyer | 14-4347 | UBDH: 14-4347 | UBD-CTFS 25 ha plot | KY973128 | KY972932 | KY972734 |
| 14-4350 | UBDH: 14-4350 | UBD-CTFS 25 ha plot | KY973129 | KY972933 | KY972735 |
| *Dryobalanops lanceolata* Burck | 22-0354 | UBDH: 22-0354 | UBD-CTFS 25 ha plot | KY973130 | KY972934 | KY972736 |
| *Dryobalanops rappa* Becc. | KASdr1 | BRUN: WKM 917/  B 000 393 | UBD plot, Andulau Forest Reserve,  Kuala Belait, BD | KY973131 | KY972935 | KY972737 |
| *Dryobalanops oblongifolia* Dyer | GB |  | Frim, Kepong, Malayasia |  | AB006378 | AB006412  AB006395 |
| *Hopea bracteata* Burck | JH01-3827 | UBDH: 01-3827 | UBD-CTFS 25 ha plot | KY973134 | KY972938 | KY972740 |
| JH04-4121 | UBDH: 04-4121 | UBD-CTFS 25 ha plot | KY973135 | KY972939 | KY972741 |
| *Hopea brevipetiolaris*  ([Thwaites](http://www.ipni.org/ipni/idAuthorSearch.do?id=10654-1&back_page=%2Fipni%2FeditSimplePlantNameSearch.do%3Ffind_wholeName%3DHopea%2Bbrevipetiolaris%2B%26output_format%3Dnormal)) P.S.Ashton | R.S. D-131ags | PDA: D-131a | Arboretum, The Royal Botanical Gardens, Peradeniya, Sri Lanka | KY973103 | KY972906 | KY972709 |
| R.S. C-291gs | PDA: C-291 | Arboretum, The Royal Botanical Gardens, Peradeniya, Sri Lanka | KY973101 | KY972904 | KY972707 |
| R.S. D-291gs | PDA: D-291 | Arboretum, The Royal Botanical Gardens, Peradeniya, Sri Lanka | KY973102 | KY972905 | KY972708 |
| *Hopea centipeda* P.S.Ashton | JH21-3841 | UBDH: 21-3841 | UBD-CTFS 25 ha plot | KY973140 | KY972944 | KY972746 |
| JH21-3935 | UBDH: 21-3935 | UBD-CTFS 25 ha plot | KY973141 | KY972945 | KY972747 |
| *Hopea discolor* Thwaites | GB |  | Kanneliya Forest Reserve, Sri Lanka |  | AB246458 | AB246523  AB246588 |
| *Hopea dryobalanoides* Miq. | JH24-5607 | UBDH: 24-5607 | UBD-CTFS 25 ha plot | KY973136 | KY972940 | KY972742 |
| JH24-0530 | UBDH: 24-0530 | UBD-CTFS 25 ha plot | KY973137 | KY972941 | KY972743 |
| *Hopea dyeri* F.Heim | KAShd1 | BRUN: BRUN 3362/  B 000 470 | KN Nursery Km 13 Bt Sawat, Kuala Belait, BD | KY973138 | KY972942 | KY972744 |
| KAShd2 | BRUN: BRUN 3362/  B 000 470 | KN Nursery Km 13 Bt Sawat, Kuala Belait, BD | KY973139 | KY972943 | KY972745 |
| *Hopea helferi* Brandis | GB |  | Frim Aboretum, Malayasia |  | AB246457 | AB246522  AB246587 |
| *Hopea jucunda* Thwaites | R.S. D-16cs,gs | PDA: D-16 | Arboretum, The Royal Botanical Gardens, Peradeniya, Sri Lanka | KY973142 | KY972946 | KY972748 |
| *Hopea jucunda* subsp*. modesta* (A.DC.) Kosterm. | R.S. D-14gs | PDA: D-14 | Arboretum, The Royal Botanical Gardens, Peradeniya, Sri Lanka | KY973143 | KY972947 | KY972749 |
| *Hopea latifolia* Symington | GB |  | Frim Arboretum, Malayasia |  | AB246456 | AB246521  AB246586 |
| *Hopea nervosa* King | JH05-5391 | UBDH: 05-5391 | UBD-CTFS 25 ha plot | KY973144 | KY972948 | KY972750 |
| JH14-4326 | UBDH: 14-4326 | UBD-CTFS 25 ha plot | KY973145 | KY972949 | KY972751 |
| *Hopea odorata* Roxb*.* | R.S. C-35gs | PDA: C-35 | Arboretum, The Royal Botanical Gardens, Peradeniya, Sri Lanka | KY973146 | KY972950 | KY972752 |
| R.S. C-36gs | PDA: C-36 | Arboretum, The Royal Botanical Gardens, Peradeniya, Sri Lanka |  |  |  |
| R.S. C-37gs | PDA: C-37 | Arboretum, The Royal Botanical Gardens, Peradeniya, Sri Lanka |  |  |  |
| SDDip2014_04 | KUFF: S.Duangjai_Dip2014_04 | Botanical Garden, Kasetsart University, Nakhon Pathom, Thailand | KY973147 | KY972951 | KY972753 |
| *Hopea pentanervia* Symington ex G.H.S.Wood | KAS1339 | BRUN: BRUN 17424/  B 000 591 | UBD plot, Km 13 Bt.Sawat, Kuala Belait, BD | KY973148 | KY972952 | KY972754 |
| KAS1340 | BRUN: BRUN 17424/  B 000 591 | UBD plot, Km 13 Bt.Sawat, Kuala Belait, BD | KY973149 | KY972953 | KY972755 |
| *Hopea subalata* Symington | GB |  | Frim Arboretum, Malayasia |  | AB246455 | AB246520  AB246585 |
| *Hopea utilis* (Bedd.) Bole | R.S. D-18gs | PDA: D-18 | Arboretum, The Royal Botanical Gardens, Peradeniya, Sri Lanka | KY973104 | KY972907 | KY972710 |
| R.S. C-183 | PDA: C-183 | Arboretum, The Royal Botanical Gardens, Peradeniya, Sri Lanka | KY973105 | KY972908 | KY972711 |
| *Hopea vaccinifolia* Ridl. ex P.S.Ashton | KAShv1 | BRUN: BRUN 18998/  B 000 822 | UBD plot, Km 13 Bt.Sawat, Kuala Belait, BD | KY973150 | KY972954 | KY972756 |
| KAShv2 | BRUN: BRUN 18998/  B 000 822 | Bt. Puan, Labi, Kuala Belait, BD | KY973151 | KY972955 | KY972757 |
| *Hopea wightiana* Wall. | GB |  | Frim Arboretum, Malyasia |  | AB246461 | AB246526  AB246591 |
| *Neobalanocarpus heimii* (King) P.S.Ashton | GB |  | Frim, Kepong, Malayasia |  | AB006383 | AB006417  AB006400 |
| *Parashorea lucida* Kurz | GB |  | Frim Kepong, Malayasia |  | AB006382 | AB006416  AB006399 |
| *Parashorea macrophylla* Wyatt-Sm. ex P.S.Ashton | JH24-4723 | UBDH: 24-4723 | UBD-CTFS 25 ha plot | KY973159 | KY972962 | KY972764 |
| JH24-4857 | UBDH: 25-4857 | UBD-CTFS 25 ha plot | KY973160 | KY972963 | KY972765 |
| *Parashorea malanoon* Merr. | JH16-1785 | UBDH: 16-1785 | UBD-CTFS 25 ha plot | KY973161 | KY972964 | KY972766 |
| JH25-0007 | UBDH: 25-0007 | UBD-CTFS 25 ha plot | KY973162 | KY972965 | KY972767 |
| *Parashorea cf. tomentella* (Symington) Meijer | JH20-2932 | UBDH: 20-2932 | UBD-CTFS 25 ha plot | KY973163 | KY972966 | KY972768 |
| JH22-2154 | UBDH: 22-2154 | UBD-CTFS 25 ha plot | KY973164 | KY972967 | KY972769 |
| *Shorea* sp*.* | KASsp1.1 | n.a. | UBD plot, Km 13 Bt.Sawat, Kuala Belait UBD-CTFS 25 ha plot | KY973271 | KY973081 | KY972884 |
| KASsp2.1 | n.a. | UBD plot, Km 13 Bt.Sawat, Kuala Belait UBD-CTFS 25 ha plot | KY973272 | KY973082 | KY972885 |
| JH19-1085 | UBDH: 19-1085 | UBD-CTFS 25 ha plot | KY973189 | KY972997 | KY972800 |
| JH19-1090 | UBDH: 19-1090 | UBD-CTFS 25 ha plot | KY973190 | KY972998 | KY972801 |
| JH08-5266 | UBDH: 08-5266 | CTFS 25 ha plot | KY973202 | KY973012 | KY972815 |
| KASsp1 | n.a. | Sg.Liang, Andulau FR, Kuala Belait, BD | KY973251 | KY973061 | KY972864 |
| *Shorea acuminatissima* Symington | KASsac1 | BRUN: KEP 80128/  B 000 893 | KN Nursery Km 13 Bt Sawat, Kuala Belait, BD | KY973167 | KY972969 | KY972772 |
| KASsac2 | BRUN: KEP 80128/  B 000 893 | KN Nursery Km 13 Bt Sawat, Kuala Belait, BD | KY973168 | KY972970 | KY972773 |
| *Shorea acuminata* Dyer | GB |  | Mersing Johor, Malayasia |  | AB246440 | AB246505  AB246570 |
| *Shorea acuta* P.S.Ashton | KASsa1 | BRUN: KEP 80088/  B 000 918 | Sg. Liang Arboretum Forest Reserve, Kuala Belait or Andulau FR, Kuala Belait, BD |  | KY972971 | KY972774 |
| KASsa2 | BRUN: KEP 80088/  B 000 918 | Sg. Liang Arboretum Forest Reserve, Kuala Belait or Andulau Forest Reserve, Kuala Belait, BD |  | KY972972 | KY972775 |
| *Shorea affinis* (Thwaites) P.S.Ashton | GB |  | Kottawa Arboretum, Sri Lanka |  | AB246471 | AB246536  AB246601 |
| *Shorea albida* Symington ex A.V.Thomas | KASsal1 | BRUN: BRUN 26298/  B 000 940 | Sg. Mau, Bt.Sawat, Kuala Belait | KY973170 | KY972974 | KY972777 |
| KASsal2 | BRUN: BRUN 26298/  B 000 940 | Sg. Mau, Bt.Sawat, Kuala Belait | KY973171 | KY972975 | KY972778 |
| *Shorea agami* P.S.Ashton | JH05-4419 | UBDH: 05-4419 | UBD-CTFS 25 ha plot | KY973183 | KY972989 | KY972792 |
| JH05-4423 | UBDH: 05-4423 | UBD-CTFS 25 ha plot | KY973184 | KY972990 | KY972793 |
| *Shorea argentifolia* Symington | JH12-4803 | UBDH: 12-4803 | UBD-CTFS 25 ha plot | KY973176 | KY972980 | KY972783 |
| JH12-4810 | UBDH: 12-4810 | UBD-CTFS 25 ha plot | KY973177 | KY972981 | KY972784 |
| *Shorea atrinervosa* Symington | JH01-3813 | UBDH: 01-3813 | UBD-CTFS 25 ha plot | KY973203 | KY973013 | KY972816 |
| JH04-4068 | UBDH: 04-4068 | UBD-CTFS 25 ha plot | KY973204 | KY973014 | KY972817 |
| *Shorea assamica* Dyer. | GB |  | Frim Arboretum, Malayasia |  | AB246453 | AB246518  AB246583 |
| *Shorea* cf*. balanocarpoides* Symington | JH01-0107 | UBDH: 01-0107 | UBD-CTFS 25 ha plot |  | KY972984 | KY972787 |
| JH01-0159 | UBDH: 01-0159 | UBD-CTFS 25 ha plot |  | KY972985 | KY972788 |
| *Shorea* cf*. beccariana* Burck | JH09-4181 | UBDH: 09-4181 | UBD-CTFS 25 ha plot | KY973172 | KY972976 | KY972779 |
| JH16-4452 | UBDH: 16-4452 | UBD-CTFS 25 ha plot | KY973173 | KY972977 | KY972780 |
| *Shorea biawak* P.S.Ashton | JH20-5545 | UBDH: 20-5545 | UBD-CTFS 25 ha plot | KY973180 | KY972986 | KY972789 |
| JH20-5559 | UBDH: 20-5549 | UBD-CTFS 25 ha plot | KY973181 | KY972987 | KY972790 |
| *Shorea bracteolata* Dyer | JH19-5045 | UBDH: 19-5405 | UBD-CTFS 25 ha plot | KY973182 | KY972988 | KY972791 |
| *Shorea bullata* P.S.Ashton | GB |  | Engkabang, Semengoh, Malayasia |  | AB246435 | AB246500  AB246565 |
| *Shorea confusa* P.S.Ashton | JH25-4813 | UBDH: 25-4813 | UBD-CTFS 25 ha plot | KY973169 | KY972973 | KY972776 |
| *Shorea congestiflora* (Thwaites) P.S.Ashton | GB |  | Kanneliya Forest Reservere, Sri Lanka |  | AB246463 | AB246528  AB246593 |
| *Shorea cordifolia* (Thwaites) P.S.Ashton | GB |  | Kanneliya Forest Reserve, Sri Lanka |  | AB246462 | AB246527  AB246592 |
| *Shorea crassa* P.S.Ashton | KASscr1 | BRUN: BRUN 3080/B 001 134 | Sg.Liang Andulau FR, Kuala Belait, BD | KY973185 | KY972991 | KY972794 |
| KASscr2 | BRUN: BRUN 3080/B 001 134 | Berakas FR, Berakas, Muara, BD | KY973186 | KY972992 | KY972795 |
| *Shorea curtisii* Dyer ex King | GB |  | Mersing Johor, Malayasia |  | AB246433 | AB246498  AB246563 |
| *Shorea disticha* (Thwaites) P.S.Ashton | R.S. C-114a | PDA: C-114a | Arboretum, The Royal Botanical Gardens, Peradeniya, Sri Lanka |  | KY972929 | KY972731 |
| *Shorea domatiosa* P.S.Ashton | JH12-5258 | UBDH: 12-5258 | UBD-CTFS 25 ha plot | KY973229 | KY973039 | KY972842 |
| JH12-5324 | UBDH: 12-5324 | UBD-CTFS 25 ha plot | KY973230 | KY973040 | KY972843 |
| *Shorea dyeri* F.Heim | GB |  | Bambarabotuwa Forest Reserve, Malyasia |  | AB246446 | AB246511  AB246576 |
| *Shorea elliptica* Burck | GB |  | Engkabang, Semengoh, Malayasia |  | AB246444 | AB246509  AB246574 |
| *Shore exelliptica* Meijer | JH08-5668 | UBDH: 08-5668 | UBD-CTFS 25 ha plot | KY973187 | KY972993 | KY972796 |
| JH10-5229 | UBDH: 10-5229 | UBD-CTFS 25 ha plot | KY973188 | KY972994 | KY972797 |
| *Shorea* cf*.* *faguetiana* F.Heim | JH13-3443 | UBDH: 13-3443  UBDH: 22-1109 | UBD-CTFS 25 ha plot  UBD-CTFS 25 ha plot |  | KY972995  KY972996 | KY972798  KY972799 |
| JH22-1109 |
| JH14-4338 | UBDH: 14-4338 | UBD-CTFS 25 ha plot | KY973174 | KY972978 | KY972781 |
| JH14-4346 | UBDH: 14-4346 | UBD-CTFS 25 ha plot | KY973175 | KY972979 | KY972782 |
| *Shorea faguetioides* P.S.Ashton | JH20-5371 | UBDH: 20-5371 | UBD-CTFS 25 ha plot | KY973209 | KY973019 | KY972822 |
| *Shorea fallax* Meijer | JH05-5358 | UBDH: 05-5358 | UBD-CTFS 25 ha plot | KY973241 | KY973051 | KY972854 |
| JH24-3922 | UBDH: 24-3922 | UBD-CTFS 25 ha plot | KY973242 | KY973052 | KY972855 |
| *Shorea ferruginea* Dyer ex Brandis | JH16-2452 | UBDH: 16-2452 | UBD-CTFS 25 ha plot | KY973191 | KY972999 | KY972802 |
| JH16-2491 | UBDH: 16-2491 | UBD-CTFS 25 ha plot | KY973192 | KY973000 | KY972803 |
| *Shore gardneri* (Thwaites) P.S.Ashton | GB |  | Bambarabotuwa Forest Reserve, Sri Lanka |  | AB246468 | AB246533  AB246598 |
| *Shorea gibbosa* Brandis | JH09-3653 | UBDH: 09-3653 | UBD-CTFS 25 ha plot | KY973224 | KY973034 | KY972837 |
| JH16-3012 | UBDH: 16-3012 | UBD-CTFS 25 ha plot | KY973225 | KY973035 | KY972838 |
| *Shorea glaucenscens* Meijer | KASsgl1 | n.a. | KN Nursery Km 13 Bt Sawat, Kuala Belait, BD | KY973195 | KY973003 | KY972806 |
| KASsgl2 | n.a. | KN Nursery Km 13 Bt Sawat, Kuala Belait, BD | KY973196 | KY973004 | KY972807 |
| *Shorea havilandii* Brandis | JH20-2908 | UBDH: 20-2908 | UBD-CTFS 25 ha plot | KY973197 | KY973005 | KY972808 |
| JH22-1867 | UBDH: 22-1867 | UBD-CTFS 25 ha plot | KY973198 | KY973006 | KY972809 |
| *Shorea henryana* Pierre | SDDip2014_02 | KUFF: S.Duangjai_Dip2014_02 | Botanical Garden, Kasetsart University, Nakhon Pathom, Thailand | KY973199 | KY973007 | KY972810 |
| *Shorea inaequilateralis* Symington | KASsi1 | BRUN: WKM 3238/  B 040 939 | KN Nursery Km 13 Bt Sawat, Kuala Belait, BD |  | KY973008 | KY972811 |
| KASsi2 | BRUN: WKM 3238/  B 040 939 | KN Nursery Km 13 Bt Sawat, Kuala Belait, BD |  | KY973009 | KY972812 |
| *Shorea johorensis* Foxw. | KASsj1 | BRUN: BRUN 355/  B 001 436 | KN Nursery Km 13 Bt Sawat, Kuala Belait, BD | KY973212 | KY973022 | KY972825 |
| KASsj2 | BRUN: BRUN 355/  B 001 436 | KN Nursery Km 13 Bt Sawat, Kuala Belait, BD | KY973213 | KY973023 | KY972826 |
| *Shorea laevis* Ridl. | JH04-4660 | UBDH: 04-4660 | UBD-CTFS 25 ha plot | KY973178 | KY972982 | KY972785 |
| JH13-3497 | UBDH: 13-3497 | UBD-CTFS 25 ha plot | KY973179 | KY972983 | KY972786 |
| *Shorea leprosula* Miq. | JH04-5604 | UBDH: 04-5604 | UBD-CTFS 25 ha plot | KY973210 | KY973020 | KY972823 |
| JH04-5861 | UBDH: 04-5861 | UBD-CTFS 25 ha plot | KY973211 | KY973021 | KY972824 |
| *Shore lissophylla* Thwaites | GB |  | Kanneliya Forest Reserve, Sri Lanka |  | AB246447 | AB246512  AB246577 |
| R.S. D-27gs | PDA: D-27 | Arboretum, The Royal Botanical Gardens, Peradeniya, Sri Lanka |  |  |  |
| *Shorea* cf*. macrophylla* (de Vriese) P.S.Ashton | KASsmac1 | BRUN: WKM 1570/  B 001 526 | Palm Garden, Sg.Liang, Kuala Belait, BD | KY973214 | KY973024 | KY972827 |
| KASsmac2 | BRUN: WKM 1570/  B 001 526 | Palm Garden, Sg.Liang, Kuala Belait, BD | KY973215 | KY973025 | KY972828 |
| *Shorea macroptera* subsp. *baillonii* (F.Heim) P.S.Ashton | JH05-5346 | UBDH: 05-5346 | UBD-CTFS 25 ha plot | KY973216 | KY973026 | KY972829 |
| *Shorea macroptera* subsp. *macropterifolia* P.S.Ashton | JH13-1894 | UBDH: 13-1894 | UBD-CTFS 25 ha plot | KY973217 | KY973027 | KY972830 |
| JH13-2667 | UBDH: 13-2667 | UBD-CTFS 25 ha plot | KY973218 | KY973028 | KY972831 |
| JH15-0401 | UBDH: 15-0401 | UBD-CTFS 25 ha plot | KY973219 | KY973029 | KY972832 |
| *Shorea* cf*. maxwelliana* King | JH09-4161 | UBDH: 09-4161 | UBD-CTFS 25 ha plot | KY973220 | KY973030 | KY972833 |
| JH20-2879 | UBDH: 20-2879 | UBD-CTFS 25 ha plot | KY973221 | KY973031 | KY972834 |
| *Shorea mecistopteryx* Ridl. | KASsmec1 | BRUN: BRUN 3280/  B 001 563 | Sg.Liang, Andulau Forest Reseve,  Kuala Belait, BD | KY973222 | KY973032 | KY972835 |
| KASsmec2 | BRUN: BRUN 3280/  B 001 563 | Sg.Liang, Andulau Forest Reserve,  Kuala Belait, BD | KY973223 | KY973033 | KY972836 |
| *Shorea megistophylla* P.S.Ashton | GB |  | Royal Botanical Gardens, Sri Lanka |  | AB246464 | AB246529  AB246594 |
| R.S. D-24cs | PDA: D-24 | Arboretum, The Royal Botanical Gardens, Peradeniya, Sri Lanka |  |  |  |
| *Shorea myrionervia* Symington ex P.S.Ashton | KASsmyr1 | BRUN: KEP 30480/  B 001 633 | Sg.Liang Arboretum, Kuala Belait, BD | KY973226 | KY973036 | KY972839 |
| KASsmyr2 | BRUN: KEP 30480/  B 001 633 | Sg.Liang Arboretum, Kuala Belait, BD | KY973227 | KY973037 | KY972840 |
| *Shorea oblongifolia* Thwaites | R.S. D-26cs,gs | PDA: D-26 | Arboretum, The Royal Botanical Gardens, Peradeniya, Sri Lanka | KY973228 | KY973038 | KY972841 |
| *Shorea obscura* Meijer | JH09-4180 | UBDH: 09-4180 | UBD-CTFS 25 ha plot | KY973200 | KY973010 | KY972813 |
| JH24-5730 | UBDH: 24-5730 | UBD-CTFS 25 ha plot | KY973201 | KY973011 | KY972814 |
| *Shorea ochracea* Symington | JH05-0615 | UBDH: 05-0615 | UBD-CTFS 25 ha plot | KY973231 | KY973041 | KY972844 |
| JH22-2120 | UBDH: 22-2120 | UBD-CTFS 25 ha plot | KY973232 | KY973042 | KY972845 |
| *Shorea ovalifolia* (Thwaites) P.S.Ashton | GB |  | Gilimale Forest, Sri Lanka |  | AB246467 | AB246532  AB246597 |
| *Shorea ovalis* (Korth.) Blumesubsp. *sarawakensis* P.S.Ashton | JH05-0012 | UBDH: 05-0012 | UBD-CTFS 25 ha plot | KY973233 | KY973043 | KY972846 |
| JH05-0055 | UBDH: 05-0055 | UBD-CTFS 25 ha plot | KY973234 | KY973044 | KY972847 |
| *Shorea ovata* Dyer ex Brandis | KASsov1 | n.a. | n.a. | KY973235 | KY973045 | KY972848 |
| KASsov2 | n.a. | n.a. | KY973236 | KY973046 | KY972849 |
| *Shorea pachyphylla* Ridl. ex Symington | KASspac1 | n.a. | n.a. | KY973237 | KY973047 | KY972850 |
| KASspac2 | n.a. | n.a. | KY973238 | KY973048 | KY972851 |
| *Shorea pallescens* P.S.Ashton | GB |  | Kanneliya Forest Reserve, Sri Lanka |  | AB246448 | AB246513  AB246578 |
| *Shorea parvifolia* Dyersubsp. *velutinata* P.S.Ashton | JH05-5369 | UBDH: 05-5369 | UBD-CTFS 25 ha plot | KY973239 | KY973049 | KY972852 |
| JH25-2700 | UBDH: 25-2700 | UBD-CTFS 25 ha plot | KY973240 | KY973050 | KY972853 |
| *Shorea parvistupulata* F.Heim | JH21-5516 | UBDH: 21-5516 | UBD-CTFS 25 ha plot | KY973193 | KY973001 | KY972804 |
| JH21-5777 | UBDH: 21-5777 | UBD-CTFS 25 ha plot | KY973194 | KY973002 | KY972805 |
| *Shorea*cf*.**pinanga*Scheff. | JH10-5213 | UBDH: 10-5213 | UBD-CTFS 25 ha plot | KY973245 | KY973055 | KY972858 |
| JH12-5295 | UBDH: 12-5295 | UBD-CTFS 25 ha plot | KY973246 | KY973056 | KY972859 |
| *Shorea quadrinervis* Slooten | JH08-4106 | UBDH: 08-4106 | UBD-CTFS 25 ha plot | KY973247 | KY973057 | KY972860 |
| JH08-4401 | UBDH: 08-4401 | UBD-CTFS 25 ha plot | KY973248 | KY973058 | KY972861 |
| *Shorea richetia* Symington | GB |  | Kubah, National Park, Malayasia |  | AB246442 | AB246507  AB246572 |
| *Shorea robusta* C.F.Gaertn. | SDDip2014_06 | KUFF: S.Duangjai_Dip2014_06 | Botanical Garden, Kasetsart University, Nakhon Pathom, Thailand | KY973249 | KY973059 | KY972862 |
| *Shorea roxburghii* G.Don | SDDip2014_03cs,gs | KUFF: S.Duangjai_Dip2014_03 | Botanical Garden, Kasetsart University, Nakhon Pathom, Thailand | KY973250 | KY973060 | KY972863 |
| *Shorea rubra* P.S.Ashton | JH08-3526 | UBDH: 08-3526 | UBD-CTFS 25 ha plot | KY973243 | KY973053 | KY972856 |
| JH08-3527 | UBDH: 08-3527 | UBD-CTFS 25 ha plot | KY973244 | KY973054 | KY972857 |
| *Shorea scaberrima* Burck | JH04-3069 | UBDH: 04-3069 | UBD-CTFS 25 ha plot | KY973252 | KY973062 | KY972865 |
| *Shorea scrobiculata* Burck | JH05-3814 | UBDH: 05-3814 | UBD-CTFS 25 ha plot | KY973205 | KY973015 | KY972818 |
| JH05-4230 | UBDH: 05-4230 | UBD-CTFS 25 ha plot | KY973206 | KY973016 | KY972819 |
| *Shorea seminis* Slooten | GB |  | Frim Arboretum, Malayasia |  | AB246450 | AB246515  AB246580 |
| *Shorea smithiana* Symington | KASsm1 | BRUN: BRUN 661/  B 002 013 | KN Nursery Km 13 Bt Sawat, Kuala Belait, BD | KY973253 | KY973063 | KY972866 |
| KASsm2 | BRUN: BRUN 661/  B 002 013 | KN Nursery Km 13 Bt Sawat, Kuala Belait, BD | KY973254 | KY973064 | KY972867 |
| *Shorea* cf*. splendida* (de Vriese) P.S.Ashton (GenBank: *S. splendens*) | GB |  | Engkaban, Semengoh, Malayasia |  | AB246443 | AB246508  AB246573 |
| *Shorea stipularis* Thwaites | GB |  | Kanneliya Forest Reserve, Sri Lanka |  | AB246454 | AB246519  AB246584 |
| *Shorea trapezifloia* (Thwaites) P.S.Ashton | GB |  | Kanneliya Forest Reserve, Sri Lanka |  | AB246466 | AB246531  AB246596 |
| *Shorea virescens* Parijs | JH20-4062 | UBDH: 20-4062 | UBD-CTFS 25 ha plot | KY973207 | KY973017 | KY972820 |
| JH20-4596 | UBDH: 20-4596 | UBD-CTFS 25 ha plot | KY973208 | KY973018 | KY972821 |
| *Shorea worthingtonii* P.S.Ashton | GB |  | Kanneliya Forest Reserve, Sri Lanka |  | AB246469 | AB246534  AB246599 |
| *Shorea xanthophylla* Symington | GB |  | Frim Arboretum, Malayasia |  | AB246452 | AB246517  AB246582 |
| *Shorea zeylanica* (Thwaites) P.S.Ashton | GB |  | Royal Botanical Gardens, Sri Lanka |  | AB246470 | AB246535  AB246600 |
| R.S. C-160gs | PDA: C.160 | Arboretum, The Royal Botanical Gardens, Peradeniya, Sri Lanka |  |  |  |
| *Stemonoporus acuminatus Bedd.* | GB |  | Kanneliya Forest Reserve, Sri Lanka |  | AB246422 | AB246487  AB246552 |
| *Stemonoporus bullatus* Kosterm. | GB |  | Kanneliya Forest Reserve, Sri Lanka |  | AB246426 | AB246491  AB246556 |
| *Stemonoporus canaliculatus* Thwaites | R.S. D-156gs | PDA: D-156 | Arboretum, The Royal Botanical Gardens, Peradeniya, Sri Lanka | KY973257 | KY973067 | KY972870 |
| R.S. D-159a | PDA: D-159a | Arboretum, The Royal Botanical Gardens, Peradeniya, Sri Lanka | KY973258 | KY973068 | KY972871 |
| *Stemonoporus gilimalensis* Kosterm. | GB |  | Gilimale Forest, Sri Lanka |  | AB246423 | AB246488  AB246553 |
| *Stemonoporus kanneliyensis* Kosterm. | GB |  | Kanneliya Forest Reserve, Sri Lanka |  | AB246429 | AB246494  AB246559 |
| *Stemonoporus lancifolius* (Thwaites) P.S.Ashton | GB |  | Kanneliya Forest Reserve, Sri Lanka |  | AB246430 | AB246495  AB246560 |
| *Stemonoporus reticulatus* Thwaites | GB |  | Kanneliya Forest Reserve, Sri Lanka |  | AB246427 | AB246492  AB246557 |
| *Stemonoporus scalarinervis* Kosterm. | GB |  | Gilimale Forest, Sri Lanka |  | AB246424 | AB246489  AB246554 |
| *Stemonoporus wightii* Thwaites | GB |  | Gilimale Forest, Sri Lanka |  | AB246428 | AB246493  AB246558 |
| *Upuna borneensis* Symington | GB |  | Frim, Kepong, Malayasia |  | AB006374 | AB006408  AB006391 |
| *Vateria copallifera*  (Retz.) Alston | R.S. D-216gs | PDA: D-216 | Arboretum, The Royal Botanical Gardens, Peradeniya, Sri Lanka | KY973260 | KY973070 | KY972873 |
| R.S. C-126 | PDA: C-126 | Arboretum, The Royal Botanical Gardens, Peradeniya, Sri Lanka | KY973259 | KY973069 | KY972872 |
| *Vateriopsis seychellanum* F.Heim | GB |  | Seychelles |  | AB246432 | AB246497  AB246562 |
| *Vatica* sp*.* | R.S. 1 | PDA: D-198a | Arboretum, The Royal Botanical Gardens, Peradeniya, Sri Lanka | KY973255 | KY973065 | KY972868 |
| R.S. 2gs | PDA: D-198a | Arboretum, The Royal Botanical Gardens, Peradeniya, Sri Lanka | KY973256 | KY973066 | KY972869 |
| *Vatica affinis* Thwaites | GB |  | Kottawa, Sri Lanka |  | AB246421 | AB246486  AB246551 |
| *Vatica bella* Slooten | GB |  | Frim Arboretum, Malayasia |  | AB246416 | AB246481  AB246546 |
| *Vatica chinensis* L. | R.S. 1 | PDA: D-28 | Arboretum, The Royal Botanical Gardens, Peradeniya, Sri Lanka | KY973263 | KY973073 | KY972876 |
| R.S. 2 | PDA: D-28 | Arboretum, The Royal Botanical Gardens, Peradeniya, Sri Lanka | KY973264 | KY973074 | KY972877 |
| *Vatica coriaceae* P.S.Ashton | KASvco1 | n.a. | n.a. | KY973265 | KY973075 | KY972878 |
| KASvco2 | n.a. | n.a. | KY973266 | KY973076 | KY972879 |
| *Vatica diospyroides* Symington | SDDip2014_05 | KUFF: S.Duangjai_Dip2014_05 | Botanical Garden, Kasetsart University, Nakhon Pathom, Thailand | KY973267 | KY973077 | KY972880 |
| *Vatica dulitensis* Symington | JH11-2884 | UBDH: 11-2884 | UBD-CTFS 25 ha plot | KY973269 | KY973079 | KY972882 |
| JH11-2886 | UBDH: 11-2886 | UBD-CTFS 25 ha plot | KY973270 | KY973080 | KY972883 |
| *Vatica endertii* Slooten | JH01-1700cs,gs | UBDH: 01-1700 | UBD-CTFS 25 ha plot | KY973261 | KY973071 | KY972874 |
| JH02-3473 | UBDH: 02-3473 | UBD-CTFS 25 ha plot | KY973262 | KY973072 | KY972875 |
| *Vatica harmandiana* F.Heim | 2075651 | K, 207565 | n.a., Thailand | KY973268 | KY973078 | KY972881 |
| *Vatica micrantha* Slooten | JH01-0092 | UBDH: 01-0092 | UBD-CTFS 25 ha plot | KY973273 | KY973083 | KY972886 |
| JH01-0178 | UBDH: 01-0178 | UBD-CTFS 25 ha plot | KY973274 | KY973084 | KY972887 |
| *Vatica cf. oblongifolia* subsp. *multinervosa* P.S.Ashton | JH08-2601 | UBDH: 08-2601 | UBD-CTFS 25 ha plot | KY973277 | KY973087 | KY972890 |
| *Vatica oblongifolia* subsp. *oblongifolia* | JH02-0174 | UBDH: 02-0174 | UBD-CTFS 25 ha plot | KY973275 | KY973085 | KY972888 |
| JH02-0259 | UBDH: 02-0259 | UBD-CTFS 25 ha plot | KY973276 | KY973086 | KY972889 |
| JH02-0279 | UBDH: 02-0279 | UBD-CTFS 25 ha plot | KY973278 | KY973088 | KY972891 |
| JH02-0434 | UBDH: 02-0434 | UBD-CTFS 25 ha plot | KY973279 | KY973089 | KY972892 |
| *Vatica odorata* (Griff.) Symingtonsubsp. *mindanensis* (Fowx.) P.S.Ashton | JH04-2600 | UBDH: 04-2600 | UBD-CTFS 25 ha plot | KY973280 | KY973090 | KY972893 |
| *Vatica pauciflora* (Korth.) BI. | GB |  | Frim Aboretum, Malayasia |  | AB246417 | AB246482  AB246547 |
| *Vatica sarawakensis* F.Heim | JH10-3487 | UBDH: 10-3487 | UBD-CTFS 25 ha plot | KY973281 | KY973091 | KY972894 |
| JH10-3744 | UBDH: 10-3744 | UBD-CTFS 25 ha plot | KY973282 | KY973092 | KY972895 |
| *Vatica vinosa* P.S.Ashton | JH01-0248 | UBDH: 01-0248 | UBD-CTFS 25 ha plot | KY973283 | KY973093 | KY972896 |
| JH01-0265 | UBDH: 01-0265 | UBD-CTFS 25 ha plot | KY973284 | KY973094 | KY972897 |
| ***Monotoideae*** | | | | | | |
| *Marquesia* | Daniel K. Harder *et al.*, 26852 | MO: 2685 | Northwestern Solwezi District; Acres National Forest/ Jirunda Botanical Reserve | KY973154 | KY972957 |  |
| *Monotes adenophylla* Gilg | Noah B. Zimba *et al*., 5982 | MO: 598 | Northwestern Mwinilunga District: Lwawu Mission | KY973155 | KY972958 | KY972760 |
| *Monotes kerstingii* Gilg | Heidi H. Schmidt *et al.*, 18082 | MO: 1808 | Nothern Mole National Park | KY973156 | KY972959 | KY972761 |
| *Monotes madagascariensis* Humbert | GB |  | Fenetrede I’Isalo, Madagascar |  | AB246478 | AB246543  AB246608 |
| ***Pakaraimaeoidea*** | | | | | | |
| *Pakaraimaea dipterocarpacea* Maguire & P.S.Ashton | Kelloff 51693 | US National Herbarium, Smithsonian Institution: 5169 | Guyana, Cuyuni-Mazaruni, Imbamadai | KY973157 | KY972960 | KY972762 |
| Wurdack 51193 | US National Herbarium, Smithsonian Institution: 5119 | Guyana, Cuyuni-Mazaruni, Imbamadai | KY973158 | KY972961 | KY972763 |
| *Leptolaena cuspidata* Baker | Chase, M.W. 331541 | K: 1000 Plant Genomes Project: 33154 | Antsiranana, Madagascar | KY973152 |  | KY972758 |
| *Leptolaena multiflora* Thou. | Randrianasdo 2411 | MO: 241 | n.a. | KY973153 | KY972956 | KY972759 |
| *Sarcolaena* sp*.* | Chase, M.W. 9031 | K: 903 | n.a., Madagascar | KY973165 | KY972968 | KY972770 |
| *Schizolaena* sp*.* | Chase, M.W. 386811 | K: 1000 Plant Genomes Project: 38681 | n.a., Madagascar | KY973166 |  | KY972771 |
| ***Cistaceae*** | | | | | | |
| *Cistus laurifolius* L. | JH273 | WU: JH 273 (photo) | Hortus Botanicus Vindobonensis, Austria, Vienna | KY973107 | KY972910 | KY972712 |
| *Fumana procumbens* Gren. & Godr. | JH274 | WU: JH 274 (photo) | Hortus Botanicus Vindobonensis, Austria, Vienna | KY973132 | KY972936 | KY972738 |
| *Helianthemum obscurum* Pers. | JH275 | WU: JH 275 (photo) | Hortus Botanicus Vindobonensis, Austria, Vienna | KY973133 | KY972937 | KY972739 |
| ***Bixaceae*** | | | | | | |
| *Bixa orellana* L. | RSF-15 | PDA: F-15 | Arboretum, The Royal Botanical Gardens, Peradeniya, Sri Lanka | KY973106 | KY972909 |  |
| *Cochlospermum vitifolium* Spreng. | GB | BioBot00410 | Area de Conservacion Guanacaste,  Sector Santa Rosa, Camino los Borrachos, Costa Rica | JQ591113 | JQ587261 |  |
| *Cochlospermum vitifolium* Spreng. | GB | BioBot00415 | Area de Conservacion Guanacaste,  Sector Santa Rosa, Camino los Borrachos, Costa Rica | JQ591114 | JQ587263 |  |
